# Supplementary material for: Modification of a Marine Pine Kraft Lignin Sample by Enzymatic Treatment with a Pycnoporus cinnabarinus Laccase
Source: MDPI journal article supplement (doi:10.3390/molecules28124873), 2023-06-20
Supplement: s1 [file s1]

## Supplementary data

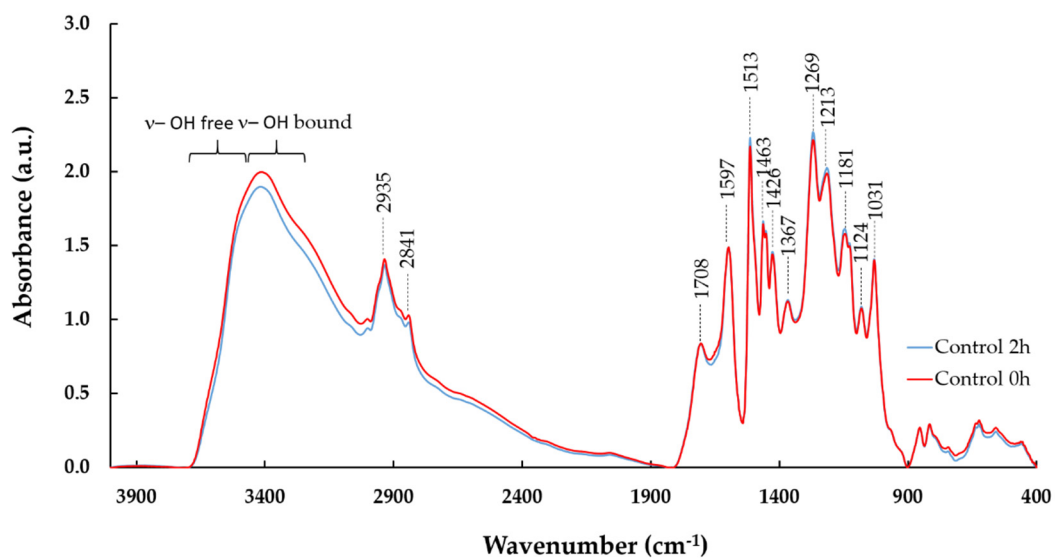

Figure S1: FTIR spectra of control kraft lignin incubated in buffer at pH 5.0 without HBT, for 0 and 2 hours.

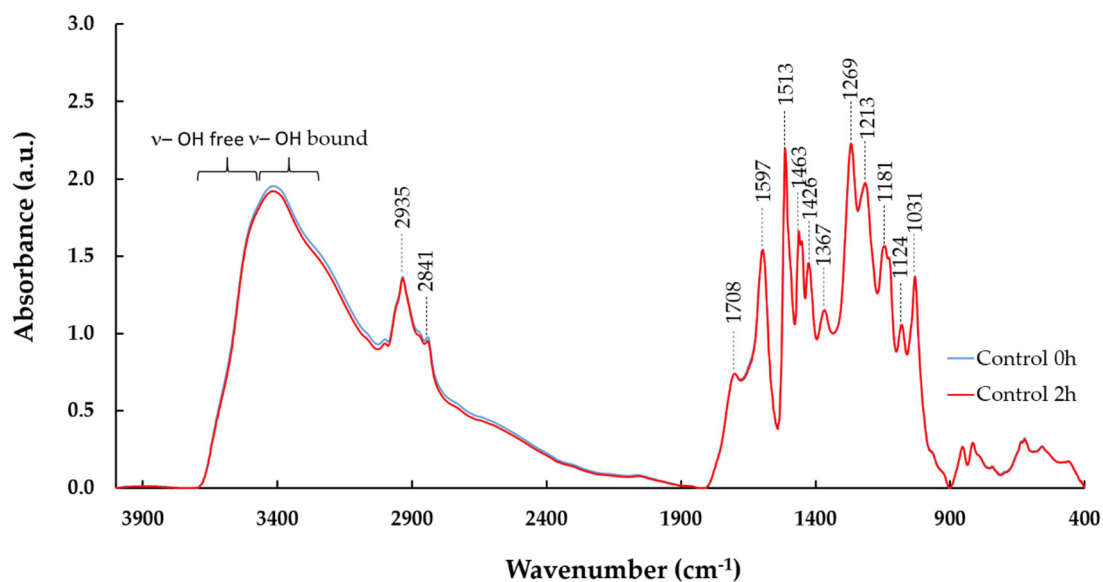

Figure S2: FTIR spectra of control kraft lignin incubated in buffer at pH 6.0 without HBT, for 0 and 2 hours.

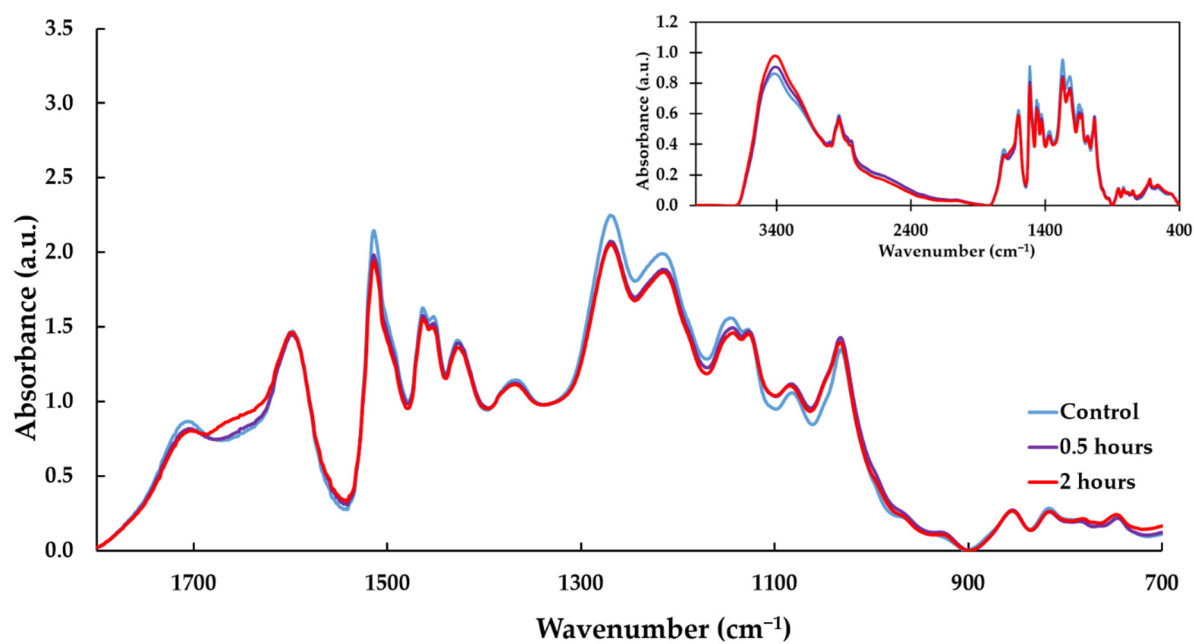

Figure S3: FTIR spectra of kraft lignin treated by *PciLac* with HBT (2%) for 0, 0.5 and 2 hours. Insert: full range. The vertical lines indicate the main bands of lignin detailed in Table 2.

A

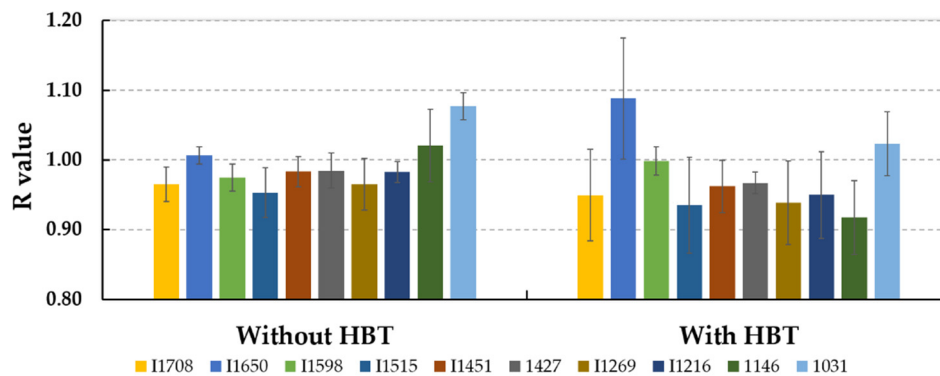

B

Two way ANOVA

|               | Indice | I1708 | I1650 | I1598 | I1514 | I1451 | I1427 | I1269 | I1216 | I1146 | I1031 |
|---------------|--------|-------|-------|-------|-------|-------|-------|-------|-------|-------|-------|
| Laccase       | F      | 5.2   | 0.9   | 2.2   | 13.4  | 5.3   | 1.7   | 11.5  | 8.9   | 5.1   | 12.9  |
|               | P      | 0.012 | 0.436 | 0.129 | 0.001 | 0.011 | 0.201 | 0.001 | 0.001 | 0.013 | 0.001 |
| HBT           | F      | 0.4   | 0.1   | 2.0   | 0.9   | 2.5   | 0.6   | 0.4   | 0.01  | 0.4   | 0.05  |
|               | P      | 0.555 | 0.754 | 0.165 | 0.344 | 0.125 | 0.450 | 0.511 | 0.933 | 0.539 | 0.825 |
| Laccase X HBT | F      | 0.3   | 1.2   | 1.4   | 1.5   | 4.5   | 1.9   | 2.3   | 2.0   | 1.1   | 2.6   |
|               | P      | 0.765 | 0.304 | 0.273 | 0.236 | 0.021 | 0.163 | 0.121 | 0.151 | 0.359 | 0.091 |

: p &lt; 0.001

: p &lt; 0.05

Figure S4: (A) R values of 10 FTIR bands identified from loading profiles. R is the intensity ratio of each FTIR band between kraft lignin treated by *Pci*Lac (130 U/g for 2 hours) with and without HBT (2%) and the respective control. (B) Results of two-way ANOVA on 10 bands identified from loading profiles. Laccase activated lignins at pH 4.5 with 0, 13 and 130 U/g of *Pci*Lac, with and without HBT for 0, 0.5 and 2 hours. Differences vs. control were significant at F statistic > 1 and P<0.001 (red) or P<0.05 (pink).

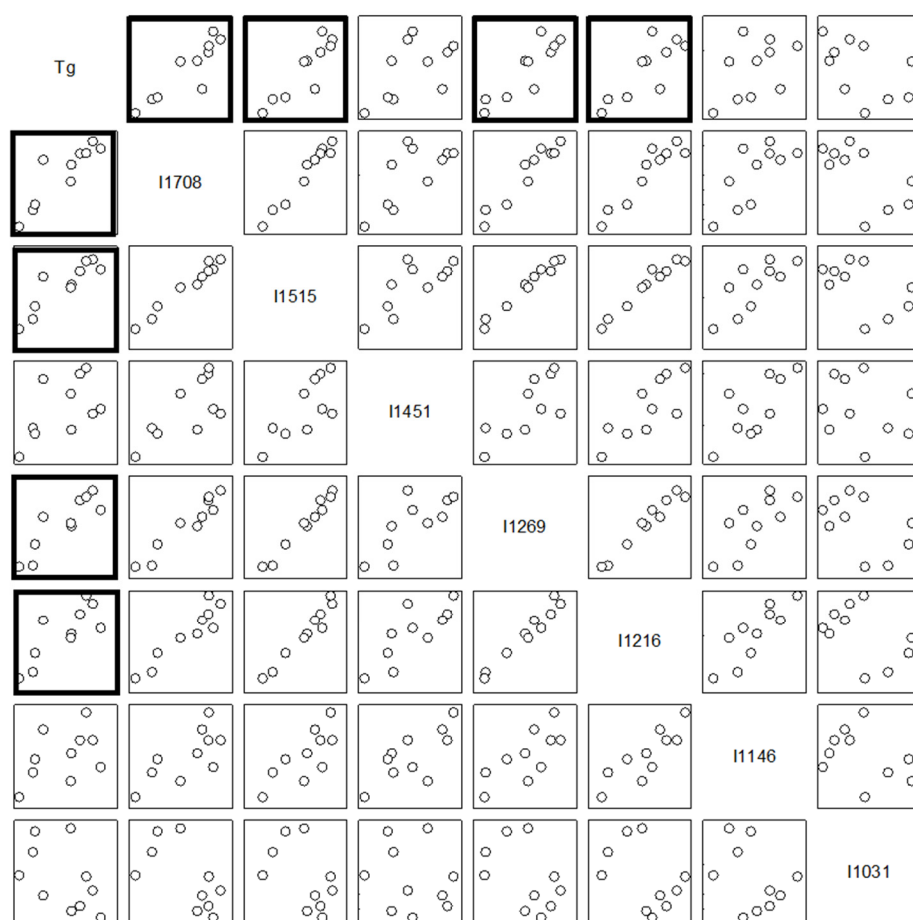

Figure S5: Scatter plot of Tg and the 7 significant FTIR bands (I1708, I1515, I1451, I1269, I1216, I1146, I1031) from figure 5c. Highlighted squares were the pair of variables with a positive correlation coefficient  $R > 0.87$  and P values below 0.001, except Tg & I1216 with  $R = 0.806$  and  $P = 0.005$ .
